# Supplementary material for: Non-linear responses of net ecosystem productivity to gradient warming in a paddy field in Northeast China
Source: PeerJ. 2020 Jun 10;8:e9327. doi: 10.7717/peerj.9327 (PMC7315621; doi:10.7717/peerj.9327)
Supplement: Data S1 [file peerj-08-9327-s001.xlsx]

## Sheet: Sheet1
DATE	TREATMENT	NEP((µmol·m-2·s-1)
2018-06-26	CK	11.6878
		12.3435
		11.0619
	W1	12.5435
		13.3674
		13.9532
	W2	15.8191
		15.982
		15.9623
	W3	16.971
		16.7413
		16.9643
	W4	12.667
		12.8854
		13.1127
2018-07-17	CK	13.4484
		14.6972
		15.9459
	W1	18.3387
		18.4203
		18.2571
	W2	21.322
		21.5077
		21.1363
	W3	22.1937
		24.4534
		23.3236
	W4	16.7228
		15.8909
		16.3069
2018-08-10	CK	20.467
		20.4723
		20.4616
	W1	22.9273
		23.3379
		23.7486
	W2	23.6972
		23.8297
		23.5647
	W3	25.3176
		24.6772
		25.958
	W4	21.4888
		21.3314
		21.6462
2018-08-31	CK	15.6188
		16.7461
		14.4914
	W1	19.1698
		19.0739
		19.2657
	W2	19.1689
		18.5292
		19.8086
	W3	22.4707
		23.143
		21.7985
	W4	17.2955
		17.0423
		17.5487
2018-09-17	CK	6.1918
		6.05007
		6.33353
	W1	7.44139
		7.64269
		7.24009
	W2	7.98941
		7.86272
		8.11609
	W3	10.6999
		10.1493
		11.2506
	W4	6.49781
		6.87589
		6.11973
