# Supplementary material for: Non-linear responses of net ecosystem productivity to gradient warming in a paddy field in Northeast China
Source: PeerJ. 2020 Jun 10;8:e9327. doi: 10.7717/peerj.9327 (PMC7315621; doi:10.7717/peerj.9327)
Supplement: Data S2 [file peerj-08-9327-s002.xlsx]

## Sheet: Sheet1
DATE	TREATMENT	GPP((µmol·m-2·s-1)
2018-06-26	CK	14.2466
		14.941
		13.2267
	W1	16.4837
		17.3551
		17.8746
	W2	20.1381
		20.2935
		20.8894
	W3	21.3147
		21.5521
		22.2119
	W4	15.9184
		16.6849
		16.8635
2018-07-17	CK	20.0562
		21.2261
		22.3959
	W1	27.5231
		28.4847
		27.8815
	W2	31.7416
		31.0564
		32.4269
	W3	35.1898
		38.7053
		36.9476
	W4	25.2246
		24.9945
		24.2069
2018-08-10	CK	31.5179
		31.6404
		31.3954
	W1	35.4488
		35.7052
		36.4243
	W2	38.8477
		39.0047
		38.6906
	W3	43.1377
		42.5916
		43.6837
	W4	32.7525
		32.9944
		33.7085
2018-08-31	CK	22.2311
		23.3738
		21.0885
	W1	27.1713
		26.8597
		27.4829
	W2	27.9511
		27.0878
		28.8143
	W3	31.3107
		32.1687
		30.4528
	W4	24.2999
		24.0253
		24.5745
2018-09-17	CK	7.8229
		7.66368
		7.98212
	W1	10.0681
		10.3566
		9.77951
	W2	11.0684
		10.9456
		11.1911
	W3	14.0752
		13.3085
		14.8419
	W4	8.53445
		8.9304
		8.1385
