# Supplementary material for: Non-linear responses of net ecosystem productivity to gradient warming in a paddy field in Northeast China
Source: PeerJ. 2020 Jun 10;8:e9327. doi: 10.7717/peerj.9327 (PMC7315621; doi:10.7717/peerj.9327)
Supplement: Data S3 [file peerj-08-9327-s003.xlsx]

## Sheet: Sheet1
DATE	TREATMENT	ER((µmol·m-2·s-1)
2018-06-26	CK	2.55875
		2.5975
		2.16484
	W1	3.94018
		3.98768
		3.92143
	W2	4.31906
		4.31152
		4.9271
	W3	4.34375
		4.8108
		5.24763
	W4	3.25145
		3.79946
		3.75087
2018-07-17	CK	6.60781
		6.52891
		6.45
	W1	9.18437
		10.0644
		9.62438
	W2	10.4197
		9.54868
		11.2906
	W3	12.9961
		14.2519
		13.624
	W4	8.50179
		9.10357
		7.9
2018-08-10	CK	11.051
		11.1681
		10.9338
	W1	12.5215
		12.3672
		12.6758
	W2	15.1504
		15.175
		15.1259
	W3	17.82
		17.9143
		17.7257
	W4	11.2637
		11.663
		12.0623
2018-08-31	CK	6.61237
		6.62768
		6.59705
	W1	8.00152
		7.78585
		8.21719
	W2	8.78219
		8.55866
		9.00571
	W3	8.83999
		9.02569
		8.65429
	W4	7.00438
		6.98304
		7.02571
2018-09-17	CK	1.6311
		1.61362
		1.64859
	W1	2.62667
		2.71393
		2.53942
	W2	3.07897
		3.08292
		3.07502
	W3	3.37529
		3.15929
		3.59129
	W4	2.03664
		2.05451
		2.01877
