# Supplementary material for: Non-linear responses of net ecosystem productivity to gradient warming in a paddy field in Northeast China
Source: PeerJ. 2020 Jun 10;8:e9327. doi: 10.7717/peerj.9327 (PMC7315621; doi:10.7717/peerj.9327)
Supplement: Data S4 [file peerj-08-9327-s004.xlsx]

## Sheet: Sheet1
DATE	TREATMENT	Temperature
2018-06-26	CK	27.2
		27.3
		27
	W1	29.6
		29.5
		29.4
	W2	33.2
		33.4
		33.7
	W3	23.7
		23.7
		23.6
	W4	22.2
		22.2
		22.2
2018-07-17	CK	27.3
		27.5
		27.2
	W1	29.8
		30.2
		30
	W2	33.6
		33.5
		33.4
	W3	25.4
		25.3
		25.5
	W4	23.1
		23.6
		22.7
2018-08-10	CK	27.7
		27.7
		28
	W1	30.4
		29.4
		31.4
	W2	33.7
		33.8
		33.3
	W3	27.1
		27
		27.2
	W4	23.6
		23.6
		23.6
2018-08-31	CK	28
		28.2
		28.7
	W1	30.8
		29.2
		28.8
	W2	34
		34.1
		34
	W3	27.6
		27.8
		27.2
	W4	23.3
		23.2
		23.5
2018-09-17	CK	28.5
		28.6
		28.4
	W1	30.3
		30.6
		30
	W2	36.4
		36.6
		36.8
	W3	29
		28.9
		29
	W4	25.4
		25.4
		25.4
